# Supplementary material for: Changes in the Density and Composition of Rhizosphere Pathogenic Fusarium and Beneficial Trichoderma Contributing to Reduced Root Rot of Intercropped Soybean
Source: MDPI journal article supplement (doi:10.3390/pathogens11040478), 2022-04-16
Supplement: s1 [file s1]

## Supplementary Materials Tables and Figures

**Table S1. Primers for PCR amplification of *Fusarium* spp. and *Trichoderma* spp.**

| Fungi                   | Primer                     | Primer sequence                              | Denature temperature | Target fragments               |
|-------------------------|----------------------------|----------------------------------------------|----------------------|--------------------------------|
| <i>Fusarium</i> spp.    | EF1                        | ATGGGTAAGGARGACAAGAC                         | 55                   | <i>EF-1<math>\alpha</math></i> |
|                         | EF2                        | GGARGTACCAGTSATCATGTT                        |                      |                                |
|                         | RPB2-5f2<br>RPB2-7cr       | GGGGWGAYCAGAAGAAGGC<br>CCCATRGCTTGYTTRCCCAT  | 55                   | <i>RPB2</i>                    |
| <i>Trichoderma</i> spp. | <i>ITS1</i><br><i>ITS4</i> | TCCGTAGGTGAACCTGCGG<br>TCCTCCGCTTATTGATATGC  | 58°C                 | <i>ITS</i>                     |
|                         | EF-728F<br>EF1LLErev       | CATCGAGAAGTTCGAGAAGG<br>AACTTGCAGGCAATGTGG   | 55°C                 | <i>EF-1<math>\alpha</math></i> |
|                         | fRPB2-5F<br>fRPB2-7cR      | GAYGAYMGWGATCAYTTYGG<br>CCCATRGCTTGYTTRCCCAT | 55°C                 | <i>RPB2</i>                    |

Notes: merge bases, Y=(C/T), M=(A/C), W=(A/T), R=(A/G); *ITS*: 5.8S ribosomal RNA gene; *EF-1 $\alpha$* : translation elongation factor alpha; *RPB2*: RNA polymerase II subunit gene.

**Table S2. Information of referred isolates used for phylogenetic analysis of *Fusarium* and *Trichoderma* species.**

| <i>Fusarium</i> and<br><i>Trichoderma</i> isolates | <i>Fusarium</i> and<br><i>Trichoderma</i> species                              | Gene bank Accession numbers |               |            |
|----------------------------------------------------|--------------------------------------------------------------------------------|-----------------------------|---------------|------------|
|                                                    |                                                                                | <i>RPB2</i>                 | <i>EF- 1α</i> | <i>ITS</i> |
| NRRL 34034 <i>F. sp.</i><br><i>FIESC</i>           | <i>Fusarium</i><br><i>incarnatum-equiseti</i><br>species complex, <i>FIESC</i> | GQ505814                    | GQ505636      | -          |
| NRRL 43637 <i>FIESC</i>                            | <i>FIESC</i>                                                                   | GQ505842                    | GQ505664      | -          |
| NRRL 28058 <i>F.</i><br><i>commune</i>             | <i>Fusarium commune</i>                                                        | MH582180                    | MH582349      | -          |
| NRRL 32709 <i>F. sp</i> <i>FSSC</i>                | <i>Fusarium solani</i> species<br>complex, <i>FSSC</i>                         | FJ240397                    | DQ247029      | -          |
| NRRL 32829                                         | <i>FSSC</i>                                                                    | FJ240401                    | DQ247136      | -          |
| NRRL 32812                                         | <i>FSSC</i>                                                                    | FJ240409                    | DQ247120      | -          |
| NRRL 32762                                         | <i>FSSC</i>                                                                    | FJ240407                    | DQ247079      | -          |
| NRRL 25388                                         | <i>FSSC</i>                                                                    | MH582411                    | MH582421      | -          |
| NRRL 22858                                         | <i>FSSC</i>                                                                    | MH582230                    | MH582424      | -          |
| NRRL 22856 <i>F. solani</i>                        | <i>FSSC</i>                                                                    | MH582228                    | MH582423      | -          |
| NRRL 22855                                         | <i>FSSC</i>                                                                    | MH582227                    | MH582422      | -          |
| NRRL 28056                                         | <i>Fusarium oxysporum</i>                                                      | MH582140                    | MH582353      | -          |
| NRRL 28057                                         | <i>F.oxysporum</i>                                                             | MH582354                    | MH582140      | -          |
| NRRL 28055                                         | <i>F.oxysporum</i>                                                             | MH582152                    | MH582351      | -          |
| NRRL 38288                                         | <i>F.oxysporum</i>                                                             | MH582352                    | MH582126      | -          |
| NRRL 52754                                         | <i>Nectriaceae spp.</i>                                                        | JF741155                    | JF740829      | -          |
| GJS04-186                                          | <i>Trichoderma</i><br><i>afroharzianum</i>                                     | FJ442691                    | FJ463301      | FJ442265   |
| GJS04-197                                          | <i>T. afroharzianum</i>                                                        | FJ442740                    | FJ463302      | FJ442214   |
| NAIMCC-F-01938                                     | <i>T. afroharzianum</i>                                                        | KY419895                    | KY419891      | KY419889   |
| GJS 01287                                          | <i>Trichoderma virens</i>                                                      | EU341804                    | AY750894      | DQ083023   |
| TRS106                                             | <i>T.virens</i>                                                                | KP009093                    | KP008854      | KP009291   |
| TRS112                                             | <i>T.virens</i>                                                                | KP009098                    | KP008860      | KP009296   |
| HZA14                                              | <i>T.virens</i>                                                                | MH647804                    | MH647804      | MH624149   |
| G.J.S 00-18                                        | <i>Trichoderma harzianum</i>                                                   | FJ442750                    | AF443946      | AF443929   |
| DIS 218E                                           | <i>T.harzianum</i>                                                             | FJ442793                    | FJ463310      | FJ442220   |
| T18                                                | <i>T.harzianum</i>                                                             | KX632549                    | KX632606      | KX632492   |
| DAOM166989                                         | <i>Trichoderma longib</i>                                                      | EU338339                    | EU338333      | EU330961   |

Notes: *ITS*: 5.8S ribosomal RNA gene; *EF-1α*: translation elongation factor alpha; *RPB2*: RNA polymerase II subunit gene.

**Table S3. Information of *Fusarium* isolates and GenBank accession information.**

| Cropping pattern | Soil type | Isolates code | GenBank accession no.          |             | Identified <i>Fusarium</i> species or species complex |
|------------------|-----------|---------------|--------------------------------|-------------|-------------------------------------------------------|
|                  |           |               | <i>EF-1<math>\alpha</math></i> | <i>RPB2</i> |                                                       |
| Intercropping    | IDR       | RA1-8         | MW319811                       | MW364892    | FIESC                                                 |
|                  |           | RA1-9         | MW319765                       | MW368344    | <i>F. oxysporum</i>                                   |
|                  |           | RA1-10        | MW319766                       | MW368345    | <i>F. oxysporum</i>                                   |
|                  |           | RA1-17        | MW319767                       | MW368380    | <i>F. oxysporum</i>                                   |
|                  |           | RA1-57        | MW345822                       | MW368346    | <i>F. oxysporum</i>                                   |
|                  |           | RA1-1         | MW331879                       | MW375137    | FSSC                                                  |
|                  |           | RA1-2         | MW331880                       | MW375343    | FSSC                                                  |
|                  |           | RA1-3         | MW331881                       | MW375138    | FSSC                                                  |
|                  |           | RA1-4         | W331882                        | MW375139    | FSSC                                                  |
|                  |           | RA1-5         | MW331883                       | MW375140    | FSSC                                                  |
|                  |           | RA1-6         | MW331884                       | MW375141    | FSSC                                                  |
|                  |           | RA1-11        | MW331885                       | MW375142    | FSSC                                                  |
|                  |           | RA1-20        | MW331886                       | MW375143    | FSSC                                                  |
|                  |           | RA1-21        | MW331887                       | MW375144    | FSSC                                                  |
|                  |           | RA1-22        | MW331888                       | MW375145    | FSSC                                                  |
|                  |           | RA1-26        | MW331889                       | MW375326    | FSSC                                                  |
|                  |           | RA1-27        | MW331890                       | MW375146    | FSSC                                                  |
|                  |           | RA1-33        | MW331891                       | MW375147    | FSSC                                                  |
|                  |           | RA1-41        | MW331892                       | MW375148    | FSSC                                                  |
|                  |           | RA1-42        | MW331893                       | MW375149    | FSSC                                                  |
|                  |           | RA1-47        | MW331894                       | MW375150    | FSSC                                                  |
|                  |           | RA1-49        | MW331895                       | MW375151    | FSSC                                                  |
|                  |           | RA1-52        | MW331896                       | MW375152    | FSSC                                                  |
|                  |           | RA1-55        | MW331897                       | MW375153    | FSSC                                                  |
|                  |           | RA1-56        | MW331898                       | MW375154    | FSSC                                                  |
|                  |           | A1-1          | MW331965                       | MW375210    | FSSC                                                  |
|                  |           | A1-2          | MW331966                       | MW375211    | FSSC                                                  |
|                  |           | A1-4          | MW331967                       | MW375323    | FSSC                                                  |
|                  |           | A1-6          | MW331968                       | MW375212    | FSSC                                                  |
|                  |           | A1-7          | MW331969                       | MW375213    | FSSC                                                  |
|                  |           | A1-9          | MW331970                       | MW375214    | FSSC                                                  |
|                  |           | A1-10         | MW331971                       | MW375215    | FSSC                                                  |
|                  |           | A1-12         | MW331972                       | MW375216    | FSSC                                                  |
|                  |           | A1-23         | MW331973                       | MW375217    | FSSC                                                  |

|            |     |          |          |          |                     |
|------------|-----|----------|----------|----------|---------------------|
|            |     | A1-24    | MW331974 | MW375218 | FSSC                |
|            |     | A1-25    | MW331975 | MW375219 | FSSC                |
|            |     | A1-35(1) | MW331976 | MW375341 | FSSC                |
|            |     | A1-44    | MW331977 | MW375221 | FSSC                |
|            |     | A1-47    | MW331978 | MW375325 | FSSC                |
|            |     | A1-48    | MW331979 | MW375222 | FSSC                |
|            |     | A1-52    | MW331980 | MW375223 | FSSC                |
|            |     | A1-55    | MW331981 | MW375224 | FSSC                |
|            |     | A1-56    | MW331982 | MW375225 | FSSC                |
|            |     | A1-57    | MW331983 | MW375226 | FSSC                |
|            |     | A1-59    | MW331984 | MW375227 | FSSC                |
|            | IHR | RA2-45   | MW319812 | MW364893 | FIESC               |
|            |     | RA2-11   | MW319768 | MW368382 | <i>F. oxysporum</i> |
|            |     | RA2-13   | MW319769 | MW368347 | <i>F. oxysporum</i> |
|            |     | RA2-25   | MW319770 | MW368348 | <i>F. oxysporum</i> |
|            |     | RA2-50   | MW319771 | MW368381 | <i>F. oxysporum</i> |
|            |     | A2-31    | MW345823 | MW368349 | <i>F. oxysporum</i> |
|            |     | A2-58    | MW319797 | MW368350 | <i>F. oxysporum</i> |
|            |     | RA2-1    | MW331901 | MW375156 | FSSC                |
|            |     | RA2-2    | MW331902 | MW375157 | FSSC                |
|            |     | RA2-3    | MW331903 | MW375158 | FSSC                |
|            |     | RA2-4    | MW331904 | MW375327 | FSSC                |
|            |     | RA2-18   | MW331906 | MW375336 | FSSC                |
|            |     | RA2-19   | MW331907 | MW375159 | FSSC                |
|            |     | RA2-21   | MW331908 | MW375160 | FSSC                |
|            |     | RA2-22   | MW331909 | MW375337 | FSSC                |
|            |     | RA2-27   | MW331910 | MW375161 | FSSC                |
|            |     | RA2-31   | MW331911 | MW375162 | FSSC                |
|            |     | RA2-44   | MW331912 | MW375163 | FSSC                |
|            |     | RA2-46   | MW331913 | MW375164 | FSSC                |
|            |     | RA2-47   | MW331914 | MW375165 | FSSC                |
|            |     | RA2-49   | MW331915 | MW375166 | FSSC                |
|            |     | RA2-52   | MW331916 | MW375167 | FSSC                |
|            |     | RA2-53   | MW331917 | MW375168 | FSSC                |
|            |     | A2-1     | MW362315 | MW375229 | FSSC                |
|            |     | A2-2     | MW362316 | MW375230 | FSSC                |
|            |     | A2-3     | MW362317 | MW375231 | FSSC                |
|            |     | A2-21    | MW362318 | MW375232 | FSSC                |
|            |     | A2-23    | MW331985 | MW375233 | FSSC                |
|            |     | A2-40    | MW362319 | MW375234 | FSSC                |
|            |     | A2-54    | MW331986 | MW375228 | FSSC                |
| Monocultur |     | RB1-25   | MW314606 | MW325768 | <i>F. commune</i>   |

|   |     |        |          |          |                     |
|---|-----|--------|----------|----------|---------------------|
| e | MDR | RB1-7  | MW319777 | MW368376 | <i>F. oxysporum</i> |
|   |     | RB1-8  | MW319778 | MW368377 | <i>F. oxysporum</i> |
|   |     | RB1-10 | MW319779 | MW368355 | <i>F. oxysporum</i> |
|   |     | RB1-15 | MW319780 | MW368378 | <i>F. oxysporum</i> |
|   |     | RB1-26 | MW319781 | MW368383 | <i>F. oxysporum</i> |
|   |     | RB1-29 | MW319782 | MW368379 | <i>F. oxysporum</i> |
|   |     | RB1-37 | MW319783 | MW368356 | <i>F. oxysporum</i> |
|   |     | RB1-42 | MW319784 | MW368357 | <i>F. oxysporum</i> |
|   |     | RB1-48 | MW319785 | MW368358 | <i>F. oxysporum</i> |
|   |     | RB1-53 | MW319786 | MW368359 | <i>F. oxysporum</i> |
|   |     | RB1-60 | MW319787 | MW368360 | <i>F. oxysporum</i> |
|   |     | B1-12  | MW319799 | MW368361 | <i>F. oxysporum</i> |
|   |     | B1-28  | MW319800 | MW368362 | <i>F. oxysporum</i> |
|   |     | B1-49  | MW319802 | MW368363 | <i>F. oxysporum</i> |
|   |     | RB1-4  | MW331923 | MW375172 | FSSC                |
|   |     | RB1-5  | MW331924 | MW375173 | FSSC                |
|   |     | RB1-17 | MW331925 | MW375174 | FSSC                |
|   |     | RB1-18 | MW331926 | MW375175 | FSSC                |
|   |     | RB1-28 | MW331927 | MW375176 | FSSC                |
|   |     | RB1-40 | MW331928 | MW375177 | FSSC                |
|   |     | RB1-43 | MW331929 | MW375178 | FSSC                |
|   |     | RB1-44 | MW331930 | MW375179 | FSSC                |
|   |     | RB1-55 | MW331931 | MW375180 | FSSC                |
|   |     | RB1-56 | MW331932 | MW375330 | FSSC                |
|   |     | B1-1   | MW331989 | MW375251 | FSSC                |
|   |     | B1-3   | MW362311 | MW375253 | FSSC                |
|   |     | B1-8   | MW332026 | MW375255 | FSSC                |
|   |     | B1-10  | MW332027 | MW375328 | FSSC                |
|   |     | B1-14  | MW332007 | MW375256 | FSSC                |
|   |     | B1-21  | MW362312 | MW375257 | FSSC                |
|   |     | B1-22  | MW332028 | MW375258 | FSSC                |
|   |     | B1-24  | MW332008 | MW375259 | FSSC                |
|   |     | B1-25  | MW331990 | MW375260 | FSSC                |
|   |     | B1-32  | MW362310 | MW375261 | FSSC                |
|   |     | B1-35  | MW332030 | MW375262 | FSSC                |
|   |     | B1-36  | MW332009 | MW375263 | FSSC                |
|   |     | B1-38  | MW331991 | MW375264 | FSSC                |
|   |     | B1-39  | MW331992 | MW375344 | FSSC                |
|   |     | B1-41  | MW362313 | MW375266 | FSSC                |
|   |     | B1-43  | MW331993 | MW375268 | FSSC                |
|   |     | B1-45  | MW332010 | MW375269 | FSSC                |
|   |     | B1-47  | MW332031 | MW375329 | FSSC                |

|  |     |          |          |          |                     |
|--|-----|----------|----------|----------|---------------------|
|  | MHR | RB2-13   | MW314608 | MW325770 | <i>F. commune</i>   |
|  |     | RB2-16   | MW319788 | MW368364 | <i>F. oxysporum</i> |
|  |     | RB2-17   | MW319789 | MW368365 | <i>F. oxysporum</i> |
|  |     | RB2-37   | MW319790 | MW368366 | <i>F. oxysporum</i> |
|  |     | RB2-49   | MW319791 | MW368367 | <i>F. oxysporum</i> |
|  |     | RB2-60   | MW319793 | MW368368 | <i>F. oxysporum</i> |
|  |     | RB2-1    | MW331933 | MW375181 | FSSC                |
|  |     | RB2-2    | MW331934 | MW375182 | FSSC                |
|  |     | RB2-5    | MW331935 | MW375338 | FSSC                |
|  |     | RB2-8    | MW331936 | MW375183 | FSSC                |
|  |     | RB2-12   | MW331937 | MW375184 | FSSC                |
|  |     | RB2-19   | MW331938 | MW375185 | FSSC                |
|  |     | RB2-21   | MW331939 | MW375335 | FSSC                |
|  |     | RB2-23   | MW331940 | MW375186 | FSSC                |
|  |     | RB2-24   | MW331941 | MW375187 | FSSC                |
|  |     | RB2-25   | MW331942 | MW375188 | FSSC                |
|  |     | RB2-26   | MW331943 | MW375346 | FSSC                |
|  |     | RB2-27   | MW331944 | MW375189 | FSSC                |
|  |     | RB2-28   | MW331945 | MW375190 | FSSC                |
|  |     | RB2-40   | MW331946 | MW375191 | FSSC                |
|  |     | RB2-41   | MW331947 | MW375192 | FSSC                |
|  |     | RB2-42   | MW331948 | MW375339 | FSSC                |
|  |     | RB2-43   | MW331949 | MW375193 | FSSC                |
|  |     | RB2-44   | MW331950 | MW375194 | FSSC                |
|  |     | RB2-46   | MW331951 | MW375195 | FSSC                |
|  |     | RB2-47   | MW331952 | MW375340 | FSSC                |
|  |     | RB2-52   | MW331953 | MW375196 | FSSC                |
|  |     | RB2-53   | MW331954 | MW375197 | FSSC                |
|  |     | RB2-55   | MW331955 | MW375198 | FSSC                |
|  |     | B2-5     | MW331994 | MW375331 | FSSC                |
|  |     | B2-14    | MW332032 | MW375332 | FSSC                |
|  |     | B2-29    | MW332011 | MW375279 | FSSC                |
|  |     | B2-34    | MW332033 | MW375284 | FSSC                |
|  |     | B2-36    | MW331996 | MW375285 | FSSC                |
|  |     | B2-37(1) | MW332034 | MW375286 | FSSC                |
|  |     | B2-38(2) | MW331997 | MW375287 | FSSC                |
|  |     | B2-39    | MW331998 | MW375288 | FSSC                |
|  |     | B2-44    | MW331999 | MW375289 | FSSC                |
|  |     | B2-48    | MW332036 | MW375290 | FSSC                |
|  |     | B2-51(1) | MW332000 | MW375291 | FSSC                |
|  |     | B2-52    | MW332038 | MW375333 | FSSC                |
|  |     | B2-53    | MW332001 | MW375292 | FSSC                |

|  |  |          |          |          |      |
|--|--|----------|----------|----------|------|
|  |  | B2-54    | MW332002 | MW375293 | FSSC |
|  |  | B2-55(2) | MW332039 | MW375294 | FSSC |
|  |  | B2-56    | MW332041 | MW375296 | FSSC |
|  |  | B2-58    | MW362314 | MW375297 | FSSC |
|  |  | B2-60    | MW332042 | MW375334 | FSSC |

Notes: *EF-1 $\alpha$* : translation elongation factor alpha; *RPB2*: RNA polymerase II subunit gene; IDR is the abbreviation of maize-soybean intercropping rhizosphere disease soil, IHR stands for maize-soybean intercropping rhizosphere healthy soil, MDR stands for the disease rhizosphere soil of soybean monoculture, while MHR stands for the healthy rhizosphere soil of soybean monoculture.

**Table S4. Information of *Trichoderma* isolates from different soil samples in monoculture and intercropping.**

| Cropping pattern | Soil type | Isolate code | GenBank accession no. |                                |             | Identified <i>Trichoderma</i> species |
|------------------|-----------|--------------|-----------------------|--------------------------------|-------------|---------------------------------------|
|                  |           |              | <i>ITS</i>            | <i>EF-1<math>\alpha</math></i> | <i>RPB2</i> |                                       |
| Intercropping    | IDR       | TRA1-9       | MW325931              | MW325735                       | -           | <i>T. virens</i>                      |
|                  |           | RA1-20       | MW325943              | MW345821                       | -           | <i>T. virens</i>                      |
|                  |           | TRA1-35      | MW325940              | MW325741                       | MW325766    | <i>T. virens</i>                      |
|                  |           | TA1-36       | MW325942              | MW325743                       | -           | <i>T. virens</i>                      |
|                  |           | TRA1-50      | MW325941              | MW325742                       | MW325767    | <i>T. virens</i>                      |
|                  |           | TA1-11       | MW338651              | -                              | -           | <i>T. virens</i>                      |
|                  |           | TRA1-28      | MW325772              | MW267259                       | MW325744    | <i>T. afroharzianum</i>               |
|                  |           | TRA1-31      | MW325778              | MW267265                       | MW325745    | <i>T. afroharzianum</i>               |
|                  |           | TRA1-32      | MW325773              | MW267260                       | MW325747    | <i>T. afroharzianum</i>               |
|                  |           | TA1-49       | MW325779              | MW267266                       | MW325749    | <i>T. afroharzianum</i>               |
|                  |           | TRA1-1       | MW325784              | MW267302                       | MW331755    | <i>T. harzianum</i>                   |
|                  |           | TRA1-2       | MW325832              | MW267346                       | MW331801    | <i>T. harzianum</i>                   |
|                  |           | TRA1-3       | MW325785              | MW267303                       | MW331756    | <i>T. harzianum</i>                   |
|                  |           | TRA1-4       | MW325786              | MW267304                       | MW331757    | <i>T. harzianum</i>                   |
|                  |           | TRA1-5       | MW325787              | MW267305                       | MW331758    | <i>T. harzianum</i>                   |
|                  |           | TRA1-6       | MW325788              | MW267306                       | MW331759    | <i>T. harzianum</i>                   |
|                  |           | TRA1-7       | MW325789              | MW267307                       | MW331760    | <i>T. harzianum</i>                   |
|                  |           | TRA1-8       | MW325790              | MW267308                       | MW331761    | <i>T. harzianum</i>                   |
|                  |           | TRA1-12      | MW325833              | MW267347                       | MW331802    | <i>T. harzianum</i>                   |
|                  |           | TRA1-13      | MW325791              | MW267309                       | MW331762    | <i>T. harzianum</i>                   |
|                  |           | TRA1-15      | MW325834              | MW267348                       | MW331803    | <i>T. harzianum</i>                   |
|                  |           | TRA1-16      | MW325792              | MW267310                       | MW331763    | <i>T. harzianum</i>                   |
|                  |           | TRA1-17      | MW325835              | MW267349                       | MW331804    | <i>T. harzianum</i>                   |
|                  |           | TRA1-19      | MW325836              | MW267350                       | MW331805    | <i>T. harzianum</i>                   |
|                  |           | TRA1-21      | MW325793              | MW267311                       | MW331764    | <i>T. harzianum</i>                   |
|                  |           | TRA1-25      | MW325794              | MW267312                       | MW331765    | <i>T. harzianum</i>                   |

|  |     |         |          |          |          |                     |
|--|-----|---------|----------|----------|----------|---------------------|
|  |     | TRA1-26 | MW325837 | MW267351 | MW331806 | <i>T. harzianum</i> |
|  |     | TRA1-27 | MW325838 | MW267352 | MW331807 | <i>T. harzianum</i> |
|  |     | TRA1-30 | MW325839 | MW267353 | MW331808 | <i>T. harzianum</i> |
|  |     | TRA1-33 | MW325840 | MW267354 | MW331809 | <i>T. harzianum</i> |
|  |     | TRA1-34 | MW325946 | MW325729 | MW325750 | <i>T. harzianum</i> |
|  |     | TRA1-39 | MW325795 | MW267313 | MW331766 | <i>T. harzianum</i> |
|  |     | TRA1-41 | MW325841 | MW267355 | MW331810 | <i>T. harzianum</i> |
|  |     | TRA1-42 | MW325947 | MW325730 | MW325751 | <i>T. harzianum</i> |
|  |     | TRA1-44 | MW325842 | MW267356 | MW331811 | <i>T. harzianum</i> |
|  |     | TRA1-45 | MW325843 | MW267357 | MW331812 | <i>T. harzianum</i> |
|  |     | TRA1-46 | MW325844 | MW267358 | MW331813 | <i>T. harzianum</i> |
|  |     | TRA1-49 | MW325845 | MW267359 | MW331814 | <i>T. harzianum</i> |
|  |     | TA1-6   | MW325880 | MW267390 | MW331849 | <i>T. harzianum</i> |
|  |     | TA1-22  | MW325881 | MW267391 | MW331850 | <i>T. harzianum</i> |
|  |     | TA1-24  | MW325882 | MW267392 | MW331851 | <i>T. harzianum</i> |
|  |     | TA1-46  | MW325883 | MW267393 | MW331852 | <i>T. harzianum</i> |
|  | IHR | TA2-2   | MW325928 | MW325733 | MW325755 | <i>T. virens</i>    |
|  |     | TRA2-22 | MW325945 | -        | -        | <i>T. virens</i>    |
|  |     | TA2-60  | MW325944 | -        | -        | <i>T. virens</i>    |
|  |     | TRA2-2  | MW325846 | MW267360 | MW331815 | <i>T. harzianum</i> |
|  |     | TRA2-3  | MW325796 | MW267314 | MW331767 | <i>T. harzianum</i> |
|  |     | TRA2-4  | MW325797 | MW267315 | MW331768 | <i>T. harzianum</i> |
|  |     | TRA2-5  | MW325798 | MW267316 | MW331878 | <i>T. harzianum</i> |
|  |     | TRA2-6  | MW325847 | MW267361 | MW331816 | <i>T. harzianum</i> |
|  |     | TRA2-8  | MW325799 | MW267317 | MW331769 | <i>T. harzianum</i> |
|  |     | TRA2-9  | MW325848 | MW267362 | MW331817 | <i>T. harzianum</i> |
|  |     | TRA2-10 | MW325849 | MW267363 | MW331818 | <i>T. harzianum</i> |
|  |     | TRA2-14 | MW325850 | MW267364 | MW331819 | <i>T. harzianum</i> |
|  |     | TRA2-15 | MW325851 | MW267365 | MW331820 | <i>T. harzianum</i> |
|  |     | TRA2-16 | MW325800 | MW267318 | MW331770 | <i>T. harzianum</i> |
|  |     | TRA2-20 | MW325801 | MW267319 | -        | <i>T. harzianum</i> |
|  |     | TRA2-21 | MW325852 | MW267366 | MW331821 | <i>T. harzianum</i> |
|  |     | TRA2-23 | MW325853 | MW267367 | MW331822 | <i>T. harzianum</i> |
|  |     | TRA2-24 | MW325854 | MW267368 | MW331823 | <i>T. harzianum</i> |
|  |     | TRA2-25 | MW325855 | -        | MW331824 | <i>T. harzianum</i> |
|  |     | TRA2-26 | MW325802 | MW267320 | MW331771 | <i>T. harzianum</i> |
|  |     | TRA2-27 | MW325856 | MW267369 | MW331825 | <i>T. harzianum</i> |
|  |     | TRA2-28 | MW325803 | MW267321 | MW331772 | <i>T. harzianum</i> |
|  |     | TRA2-29 | MW325857 | MW267370 | MW331826 | <i>T. harzianum</i> |
|  |     | TRA2-30 | MW325858 | MW267371 | -        | <i>T. harzianum</i> |
|  |     | TRA2-31 | MW325859 | MW267372 | MW331827 | <i>T. harzianum</i> |
|  |     | TRA2-32 | MW325860 | MW267373 | MW331828 | <i>T. harzianum</i> |
|  |     | TRA2-33 | MW325861 | MW267374 | MW331829 | <i>T. harzianum</i> |



|  |  |         |          |          |          |                     |
|--|--|---------|----------|----------|----------|---------------------|
|  |  | TRA2-34 | MW325862 | MW267375 | MW331830 | <i>T. harzianum</i> |
|  |  | TRA2-36 | MW325863 | MW267376 | MW331831 | <i>T. harzianum</i> |
|  |  | TRA2-37 | MW325864 | MW267377 | MW331832 | <i>T. harzianum</i> |
|  |  | TRA2-38 | MW325804 | MW267322 | MW331773 | <i>T. harzianum</i> |
|  |  | TRA2-40 | MW325805 | MW267323 | MW331774 | <i>T. harzianum</i> |
|  |  | TRA2-41 | MW325865 | MW267378 | MW331833 | <i>T. harzianum</i> |
|  |  | TRA2-42 | MW325866 | MW267379 | MW331834 | <i>T. harzianum</i> |
|  |  | TRA2-46 | MW325867 | MW267380 | MW331835 | <i>T. harzianum</i> |
|  |  | TRA2-48 | MW325806 | MW267324 | MW331775 | <i>T. harzianum</i> |
|  |  | TRA2-49 | MW325868 | MW267381 | MW331836 | <i>T. harzianum</i> |
|  |  | TRA2-50 | MW325869 | MW267382 | MW331837 | <i>T. harzianum</i> |
|  |  | TA2-1   | MW325884 | MW267394 | MW331853 | <i>T. harzianum</i> |
|  |  | TA2-3   | MW325885 | MW267395 | MW331854 | <i>T. harzianum</i> |
|  |  | TA2-9   | MW325886 | MW267396 | MW331855 | <i>T. harzianum</i> |
|  |  | TA2-10  | MW325887 | MW267397 | MW331856 | <i>T. harzianum</i> |
|  |  | TA2-12  | MW325816 | MW267331 | MW331785 | <i>T. harzianum</i> |
|  |  | TA2-13  | MW325817 | MW267332 | MW331786 | <i>T. harzianum</i> |
|  |  | TA2-14  | MW325888 | MW267398 | MW331857 | <i>T. harzianum</i> |
|  |  | TA2-15  | MW325889 | MW267399 | MW331858 | <i>T. harzianum</i> |
|  |  | TA2-17  | MW325818 | MW267333 | MW331787 | <i>T. harzianum</i> |
|  |  | TA2-20  | MW325890 | MW267400 | MW331859 | <i>T. harzianum</i> |
|  |  | TA2-22  | MW325819 | -        | MW331788 | <i>T. harzianum</i> |
|  |  | TA2-23  | MW325891 | MW267401 | MW331860 | <i>T. harzianum</i> |
|  |  | TA2-24  | MW325892 | MW267402 | MW331861 | <i>T. harzianum</i> |
|  |  | TA2-25  | MW325820 | MW267334 | MW331789 | <i>T. harzianum</i> |
|  |  | TA2-27  | MW325821 | MW267335 | MW331790 | <i>T. harzianum</i> |
|  |  | TA2-28  | MW325893 | MW267403 | MW331862 | <i>T. harzianum</i> |
|  |  | TA2-29  | MW325894 | MW267404 | MW331863 | <i>T. harzianum</i> |
|  |  | TA2-30  | MW325822 | MW267336 | MW331791 | <i>T. harzianum</i> |
|  |  | TA2-33  | MW325895 | MW267405 | MW331864 | <i>T. harzianum</i> |
|  |  | TA2-34  | MW325896 | MW267406 | -        | <i>T. harzianum</i> |
|  |  | TA2-36  | MW325897 | MW267407 | MW331865 | <i>T. harzianum</i> |
|  |  | TA2-38  | MW325898 | MW267408 | MW331866 | <i>T. harzianum</i> |
|  |  | TA2-41  | MW325899 | MW267409 | MW331867 | <i>T. harzianum</i> |
|  |  | TA2-42  | MW325823 | MW267337 | MW331792 | <i>T. harzianum</i> |
|  |  | TA2-43  | MW325900 | MW267410 | MW331868 | <i>T. harzianum</i> |
|  |  | TA2-44  | MW325824 | MW267338 | MW331793 | <i>T. harzianum</i> |
|  |  | TA2-46  | MW325901 | MW267411 | MW331869 | <i>T. harzianum</i> |
|  |  | TA2-47  | MW325902 | MW267412 | MW331870 | <i>T. harzianum</i> |
|  |  | TA2-49  | MW325903 | MW267413 | MW331871 | <i>T. harzianum</i> |
|  |  | TA2-50  | MW325825 | MW267339 | MW331794 | <i>T. harzianum</i> |
|  |  | TA2-52  | MW325904 | MW267414 | MW331872 | <i>T. harzianum</i> |

|             |     |         |          |          |          |                         |
|-------------|-----|---------|----------|----------|----------|-------------------------|
| Monoculture |     | TA2-53  | MW325826 | MW267340 | MW331795 | <i>T. harzianum</i>     |
|             |     | TA2-54  | MW325905 | MW267415 | MW331873 | <i>T. harzianum</i>     |
|             |     | TA2-55  | MW325827 | MW267341 | MW331796 | <i>T. harzianum</i>     |
|             |     | TA2-58  | MW325906 | MW267416 | MW331874 | <i>T. harzianum</i>     |
|             |     | TA2-59  | MW325907 | MW267417 | MW331875 | <i>T. harzianum</i>     |
|             | MDR | TRB1-7  | MW325932 | MW325737 | MW325758 | <i>T. virens</i>        |
|             |     | TRB1-12 | MW325933 | MW325738 | MW325759 | <i>T. virens</i>        |
|             |     | TRB1-15 | MW325934 | MW325739 | MW325760 | <i>T. virens</i>        |
|             |     | TB1-10  | MW325780 | MW267267 | -        | <i>T. afroharzianum</i> |
|             |     | TB1-23  | MW325781 | MW267268 | -        | <i>T. afroharzianum</i> |
|             |     | TB1-26  | MW325782 | MW267269 | -        | <i>T. afroharzianum</i> |
|             |     | TRB1-3  | MW325783 | MW267330 | MW331845 | <i>T. harzianum</i>     |
|             |     | TB1-1   | MW325921 | MW267431 | -        | <i>T. harzianum</i>     |
|             |     | TB1-56  | MW325922 | MW267432 | -        | <i>T. harzianum</i>     |
|             | MHR | TRB2-17 | MW325926 | MW325732 | MW325753 | <i>T. virens</i>        |
|             |     | TB2-7   | MW325929 | MW325734 | MW325756 | <i>T. virens</i>        |
|             |     | TB2-14  | MW325774 | MW267261 | MW325748 | <i>T. afroharzianum</i> |
|             |     | TRB2-2  | MW325877 | MW267387 | MW331846 | <i>T. harzianum</i>     |
|             |     | TRB2-3  | MW325878 | MW267388 | MW331847 | <i>T. harzianum</i>     |
|             |     | TRB2-28 | MW325879 | MW267389 | MW331848 | <i>T. harzianum</i>     |
|             |     | TB2-1   | MW325923 | MW267433 | MW331876 | <i>T. harzianum</i>     |
|             |     | TB2-2   | MW325831 | MW267345 | MW331800 | <i>T. harzianum</i>     |
|             |     | TB2-13  | MW325924 | MW267434 | MW331877 | <i>T. harzianum</i>     |

Notes: *ITS*: 5.8 S ribosomal RNA gene; *EF-1 $\alpha$* : translation elongation factor alpha; *RPB2*: RNA polymerase II subunit gene; IDR is the abbreviation of maize-soybean intercropping rhizosphere disease soil, IHR stands for maize-soybean intercropping rhizosphere healthy soil, MDR stands for the disease rhizosphere soil of soybean monoculture, while MHR stands for the healthy rhizosphere soil of soybean monoculture.

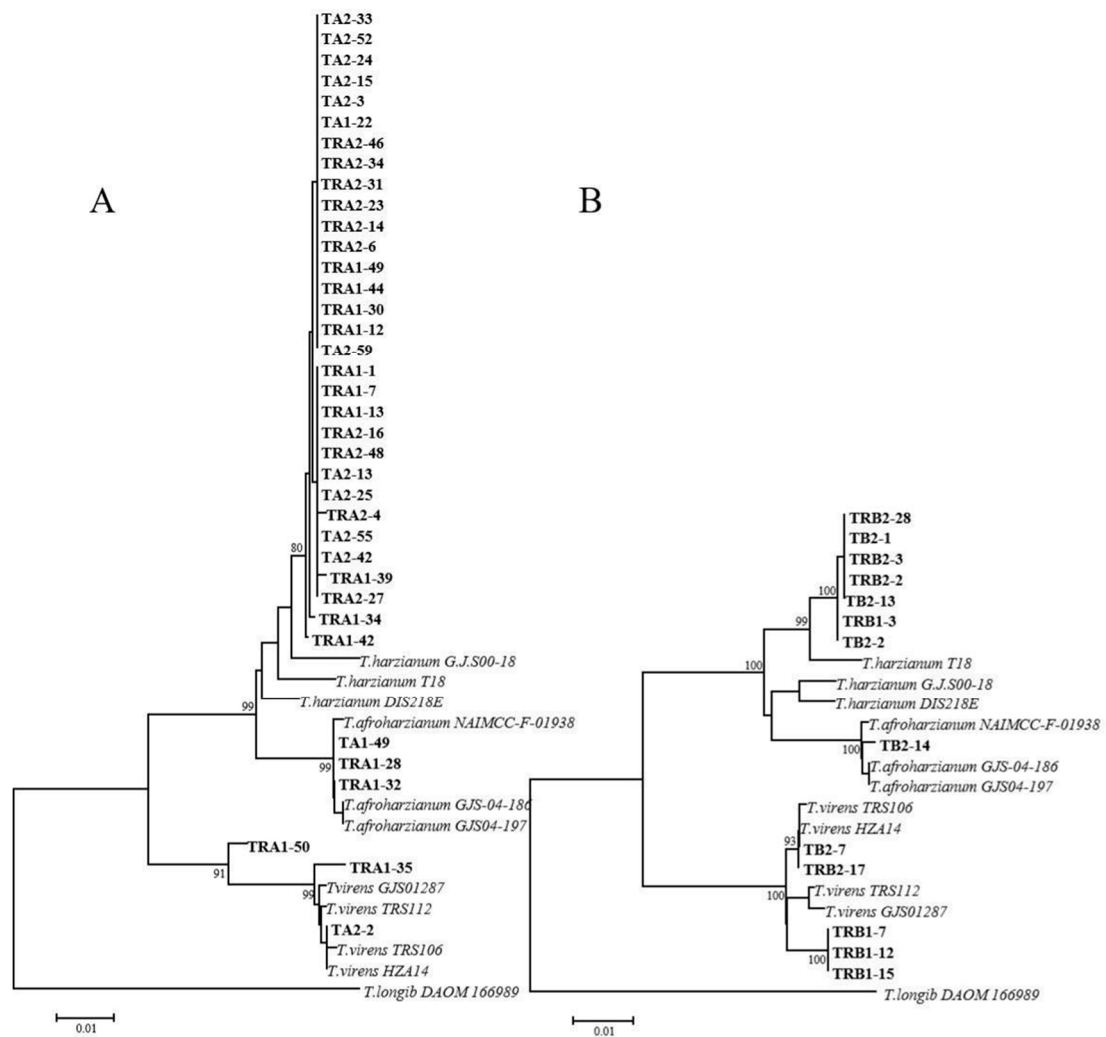

**Figure S1.** Phylogenetic tree of *ITS* and *EF-1 $\alpha$*  of *Trichoderma* spp. isolated from intercropping and monoculture. The Maximum Parsimony based on *ITS* and *EF-1 $\alpha$*  genes was constructed for intercropping (A) and monoculture (B), respectively. Bootstrap support values was more than 80% in both trees and obtained from 1000 replications. The *Trichoderma longib* (DAOM 166989) was used as the outgroup isolate.
